# Supplementary material
Source: publisher site journal article supplement (https://www.spandidos-publications.com/8399/downloadSupplementary)
Supplement: Supplementary file 1 [file downloadSupplementary]

Table SI. Targeted therapies for treating UC in clinical trials.

| First author, year          | Target        | Drug       | Application                                                         | Efficacy summary                                                                                                                                                | Clinical status | (Ref.) |
|-----------------------------|---------------|------------|---------------------------------------------------------------------|-----------------------------------------------------------------------------------------------------------------------------------------------------------------|-----------------|--------|
| Croft <i>et al</i> , 2021   | TNF- $\alpha$ | Adalimumab | Children aged 4-17 years with moderate-to-severe ulcerative colitis | Clinical remission:<br>8 weeks: 43-60% (different dose induction)<br>52 weeks: 29% (standard-dose maintenance adalimumab group), 37% (pooled adalimumab groups) | Phase III       | (39)   |
| Feagan <i>et al</i> , 2023  | TNF- $\alpha$ | Golimumab  | Moderately to severely active UC                                    | Clinical response:<br>12 weeks: 61%                                                                                                                             | Phase II        | (40)   |
| Feagan <i>et al</i> , 2023  | IL-12/23      | Guselkumab | Moderately to severely active UC                                    | Clinical response:<br>12 weeks: 75%                                                                                                                             | Phase II        | (40)   |
| Harris <i>et al</i> , 2016  | TNF- $\alpha$ | AVX-470    | Active UC                                                           | Clinical response:<br>4 weeks: 25.9%                                                                                                                            | -               | (41)   |
| Hartman <i>et al</i> , 2016 | TNF- $\alpha$ | AVX-470    | Active UC                                                           | Decreased TNF, MPO and epithelial cell apoptosis in colon tissue after 4 weeks of treatment                                                                     | -               | (42)   |
| Hibi <i>et al</i> , 2017    | TNF- $\alpha$ | Golimumab  | Moderately to severely active UC                                    | Clinical remission:<br>54 weeks: 50%                                                                                                                            | Phase III       | (43)   |
| Panés <i>et al</i> , 2022   | TNF- $\alpha$ | Adalimumab | Moderately to severely                                              | Clinical remission:                                                                                                                                             | Phase III       | (44)   |

|                                  |               |            |                                     |                                                                                                                                    |              |      |
|----------------------------------|---------------|------------|-------------------------------------|------------------------------------------------------------------------------------------------------------------------------------|--------------|------|
|                                  |               |            | active UC                           | 8 weeks: 10.9% (standard induction regimen), 13.3%<br>(higher induction regimen)<br>52 weeks: 29-41.1% (different dosing regimens) |              |      |
| Rutgeerts <i>et al</i> ,<br>2015 | TNF- $\alpha$ | Golimumab  | Moderately to severely<br>active UC | Clinical remission:<br>6 weeks: 44% (2 mg/kg), 41.6% (4-mg/kg)                                                                     | Phase II/III | (45) |
| Sandborn <i>et al</i> ,<br>2013  | TNF- $\alpha$ | HMPL-004   | Mildly-to-moderately active<br>UC   | Clinical remission:<br>8 weeks: 34% (1200 mg), 38% (1800 mg)                                                                       | -            | (46) |
| Sands <i>et al</i> , 2019        | TNF- $\alpha$ | Adalimumab | Moderately to severely<br>active UC | Clinical remission:<br>52 weeks: 22.5%                                                                                             | Phase IIIb   | (47) |
| Schreiber <i>et al</i> ,<br>2021 | TNF- $\alpha$ | Infliximab | Active UC                           | Clinical remission:<br>54 weeks: 68.4%                                                                                             | Phase I      | (48) |
| Suzuki <i>et al</i> , 2014       | TNF- $\alpha$ | Adalimumab | Moderately to severely<br>active UC | Clinical remission:<br>8 weeks: 43% (adalimumab 80/40), 50% (adalimumab<br>160/80)<br>52 weeks: 23%                                | Phase II/III | (49) |
| Syversen <i>et al</i> ,<br>2021  | TNF- $\alpha$ | Infliximab | Moderately to severely<br>active UC | Clinical remission:<br>52 weeks: 19.7%                                                                                             | Phase III    | (50) |

|                                     |               |              |                                               |                                                                                                            |           |      |
|-------------------------------------|---------------|--------------|-----------------------------------------------|------------------------------------------------------------------------------------------------------------|-----------|------|
| Tajiri <i>et al</i> , 2019          | TNF- $\alpha$ | Infliximab   | Pediatric patients with moderate-to-severe UC | Clinical remission:<br>30 weeks: 42.9%                                                                     | Phase III | (51) |
| Tang <i>et al</i> , 2011            | TNF- $\alpha$ | HMPL-004     | Mildly-to-moderately active UC                | Clinical remission:<br>8 weeks: 21%                                                                        | -         | (52) |
| D'Haens <i>et al</i> , 2024         | IL-12/23      | Mirikizumab  | Moderately to severely active UC              | Clinical remission:<br>52 weeks: 36.1%                                                                     | Phase III | (53) |
| Danese <i>et al</i> , 2022          | IL-12/23      | Ustekinumab  | Moderately to severely active UC              | Clinical remission:<br>2 weeks: 20.0% (130 mg), 20.2% (6 mg/kg)                                            | Phase III | (54) |
| Peyrin-Biroulet <i>et al</i> , 2023 | IL-12/23      | Guselkumab   | Moderately to severely active UC              | Clinical response:<br>12 weeks: 60.7% (400 mg), 61.4% (200 mg)<br>24 weeks: 50.0% (400 mg), 54.3% (200 mg) | Phase IIb | (55) |
| Sands <i>et al</i> , 2019           | IL-12/23      | Ustekinumab  | Moderately to severely active UC              | Clinical remission:<br>8 weeks: 15.5% (6 mg/kg), 15.6% (130 mg)<br>44 weeks: 38.4%, 43.8%                  | Phase III | (56) |
| Danese <i>et al</i> , 2022          | JAK/ST<br>AT  | Upadacitinib | Moderately to severely active UC              | Clinical remission:<br>8 weeks: 26% (group 1), 34% (group 2)<br>52 weeks: 42% (group 1), 52% (group 2)     | Phase III | (58) |

|                                 |              |              |                                     |                                                                                                     |               |      |
|---------------------------------|--------------|--------------|-------------------------------------|-----------------------------------------------------------------------------------------------------|---------------|------|
| Feagan <i>et al</i> , 2021      | JAK/ST<br>AT | Filgotinib   | Moderately to severely<br>active UC | Clinical remission:<br>10 weeks: 11.5% (study B), 26.1% (study A)<br>58 weeks: 37.2%                | Phase IIb/III | (59) |
| Gros <i>et al</i> , 2023        | JAK/ST<br>AT | Filgotinib   | Active UC                           | Clinical remission:<br>12 weeks: 71.9%<br>24 weeks: 76.4%                                           | -             | (60) |
| Sandborn <i>et al</i> ,<br>2020 | JAK/ST<br>AT | Upadacitinib | Moderately to severely<br>active UC | Clinical remission:<br>8 weeks: 8.5-19.6% (different doses)                                         | Phase IIb     | (61) |
| Sandborn <i>et al</i> ,<br>2020 | JAK/ST<br>AT | Izencitinib  | Moderately to severely<br>active UC | Day 28: reduced trend of UC disease activity.                                                       | Phase I b     | (62) |
| Sandborn <i>et al</i> ,<br>2022 | JAK/ST<br>AT | Tofacitinib  | Moderately to severely<br>active UC | Clinical response:<br>8 weeks: 47.8%<br>12 months: 70.3%<br>Clinical remission:<br>12 months: 44.6% | Phase II      | (63) |
| Sandborn <i>et al</i> ,<br>2017 | JAK/ST<br>AT | Tofacitinib  | Moderately to severely<br>active UC | Clinical remission:<br>8 weeks: 16.6% (trial 2), 18.5% (trial 1)                                    | Phase III     | (64) |

|                                  |              |             |                                     |                                                                                                         |           |      |
|----------------------------------|--------------|-------------|-------------------------------------|---------------------------------------------------------------------------------------------------------|-----------|------|
|                                  |              |             |                                     | 52 weeks: 34.3% (5 mg), 40.6% (10 mg)                                                                   |           |      |
| Sands <i>et al</i> , 2018        | JAK/ST<br>AT | Peficitinib | Moderately to severely<br>active UC | Clinical remission:<br>8 weeks: 15.9-27.3% (different doses)                                            | Phase II  | (65) |
| Singh <i>et al</i> , 2024        | JAK/ST<br>AT | Tofacitinib | Moderately active UC                | Clinical remission:<br>8 weeks: 16.28%                                                                  | -         | (66) |
| Sandborn <i>et al</i> ,<br>2012  | JAK/ST<br>AT | Tofacitinib | Moderately to severely<br>active UC | Clinical remission:<br>8 weeks: 13-48% (different doses)                                                | Phase II  | (67) |
| Danese <i>et al</i> , 2020       | PDE4         | Apremilast  | Active UC                           | Clinical remission:<br>12 weeks: 21.8% (40 mg), 31.6% (30 mg)<br>52 weeks: 32.7% (40 mg), 40.4% (30 mg) | Phase II  | (68) |
| Schreiber <i>et al</i> ,<br>2007 | PDE4         | Tetomilast  | Mildly to moderately active         | Clinical improvement:<br>8 weeks: 39% (50 mg), 52% (25 mg)                                              | Phase II  | (69) |
| Danese <i>et al</i> , 2024       | S1P1         | Ozanimod    | Moderately to severely<br>active UC | Clinical remission:<br>52 weeks: 54%                                                                    | Phase III | (70) |
| Sandbrom <i>et al</i> ,<br>2021  | S1P1         | Ozanimod    | Moderately to severely<br>active UC | Clinical remission:<br>10 weeks: 18.4%<br>52 weeks: 37.0%                                               | Phase III | (71) |

|                                 |      |           |                                     |                                                                                                                          |           |      |
|---------------------------------|------|-----------|-------------------------------------|--------------------------------------------------------------------------------------------------------------------------|-----------|------|
| Sandborn <i>et al</i> ,<br>2016 | S1P1 | Ozanimod  | Moderately to severely<br>active UC | Clinical response:<br>8 weeks: 54% (0.5 mg), 57% (1 mg)<br><br>Clinical remission:<br>32 weeks: 21% (1 mg), 26% (0.5 mg) | Phase II  | (72) |
| Sandborn <i>et al</i> ,<br>2020 | S1P1 | Etrasimod | Moderately to severely<br>active UC | 12 weeks: endoscopic improvement occurred in 41.8%<br><br>of patients                                                    | Phase II  | (73) |
| Sandborn <i>et al</i> ,<br>2023 | S1P1 | Etrasimod | Moderately to severely<br>active UC | Clinical remission:<br>12 weeks: 25% (group 12), 27% (group 52)<br><br>52 weeks: 32%                                     | Phase III | (74) |

UC, ulcerative colitis; JAK, Janus kinase; PDE4, 3',5'-cyclic-AMP phosphodiesterase 4; S1P1, sphingosine 1-phosphate receptor 1; HMPL-004, andrographolide; MPO, Myeloperoxidase.

Table SII. RAGE inhibitors.

| First author, year          | Inhibitors                              | Binding domain to RAGE | Effects                                                   | (Ref.) |
|-----------------------------|-----------------------------------------|------------------------|-----------------------------------------------------------|--------|
| Hudson and Lippman,<br>2018 | Azeliragon                              | V                      | AGEs, HMGB1, S100B and A $\beta$ -RAGE binding inhibition | (84)   |
| Aljohi <i>et al</i> , 2018  | Momordica charantia                     | -                      | AGEs-RAGE binding inhibition                              | (236)  |
| Watson <i>et al</i> , 2012  | Alagebrium                              | -                      | Reduced AGE accumulation                                  | (237)  |
| Zhang <i>et al</i> , 2018   | N-benzyl-4-chloro-N-cyclohexylbenzamide | V                      | AGEs                                                      | (238)  |
| Arab <i>et al</i> , 2022    | Troxeutin                               | -                      | HMGB1-RAGE binding inhibition                             | (239)  |
| He <i>et al</i> , 2022      | N-benzyl-4-chloro-N-cyclohexylbenzamide | V                      | HMGB1-RAGE binding inhibition                             | (240)  |

|                            |                                         |   |                                    |       |
|----------------------------|-----------------------------------------|---|------------------------------------|-------|
| Tang <i>et al</i> , 2022   | Tanshinone IIA                          | - | HMGB1                              | (241) |
| Shihui <i>et al</i> , 2024 | N-benzyl-4-chloro-N-cyclohexylbenzamide | V | S100                               | (242) |
| Ding <i>et al</i> , 2020   | Tanshinone IIA                          | - | A $\beta$ -RAGE binding inhibition | (243) |
| Liu <i>et al</i> , 2023    | Tanshinone IIA                          | - | Matrix metalloproteinase-9         | (244) |

S100, protein S100; AGEs, advanced glycation end products; RAGE, receptor for AGEs; A $\beta$ , amyloid  $\beta$ ; HMGB1, high-mobility group box 1.
